# Supplementary material for: A Redox-Neutral, Two-Enzyme Cascade for the Production of Malate and Gluconate from Pyruvate and Glucose
Source: MDPI journal article supplement (doi:10.3390/app11114877), 2021-05-26

# A redox-neutral, two-enzyme cascade for the production of malate and gluconate from pyruvate and glucose

Ravneet Mandair <sup>1</sup>, Pinar Karagoz <sup>1,2</sup> and Roslyn M. Bill <sup>1,\*</sup>

<sup>1</sup> College of Health and Life Sciences, Aston University, Birmingham B4 7ET, UK; [ravmandair92@hotmail.com](mailto:ravmandair92@hotmail.com) (R.M.); [p.karagoz@ucl.ac.uk](mailto:p.karagoz@ucl.ac.uk) (P.K.)

<sup>2</sup> Department of Biochemical Engineering, University College London, Gower Street, London WC1E 6BT, UK;

\* Correspondence: [r.m.bill@aston.ac.uk](mailto:r.m.bill@aston.ac.uk); Tel.: +44-12-1204-4274

## Supplementary Materials:

**Table S1.** Atmospheric condition independent variables and their values. O<sub>2</sub> and CO<sub>2</sub> are in % and temperature is in °C.

| Coded Levels                        | -   | 0  | +   |
|-------------------------------------|-----|----|-----|
| O <sub>2</sub> , (x <sub>1</sub> )  | 2.5 | 5  | 7.5 |
| CO <sub>2</sub> , (x <sub>2</sub> ) | 5   | 10 | 15  |
| Temperature, (x <sub>3</sub> )      | 45  | 55 | 65  |

**Table S2.** Box-Behnken design for 3 factors with 3 center points. O<sub>2</sub> and CO<sub>2</sub> are in % and temperature is in °C.

| Experiment number | O <sub>2</sub> (x <sub>1</sub> ) | CO <sub>2</sub> (x <sub>2</sub> ) | Temperature (x <sub>3</sub> ) |
|-------------------|----------------------------------|-----------------------------------|-------------------------------|
| 1                 | -                                | -                                 | 0                             |
| 2                 | +                                | -                                 | 0                             |
| 3                 | -                                | +                                 | 0                             |
| 4                 | +                                | +                                 | 0                             |
| 5                 | -                                | 0                                 | -                             |
| 6                 | +                                | 0                                 | -                             |
| 7                 | -                                | 0                                 | +                             |
| 8                 | +                                | 0                                 | +                             |
| 9                 | 0                                | -                                 | -                             |
| 10                | 0                                | +                                 | -                             |
| 11                | 0                                | -                                 | +                             |
| 12                | 0                                | +                                 | +                             |
| 13                | 0                                | 0                                 | 0                             |
| 14                | 0                                | 0                                 | 0                             |
| 15                | 0                                | 0                                 | 0                             |

**Table S3.** Change in kinetic parameters of GDH in the presence of different pyruvate concentrations.

| Kinetic parameters. | Pyruvate concentration (mM) |      |      |      |
|---------------------|-----------------------------|------|------|------|
|                     | 0                           | 10   | 15   | 20   |
| $K_M$ (mM)          | 0.42                        | 0.41 | 0.95 | 2.55 |
| $V_{max}$ (mM/min)  | 0.04                        | 0.03 | 0.02 | 0.03 |

**Figure S1.** Schematic representation of redox balanced cascade with cofactor recycling.

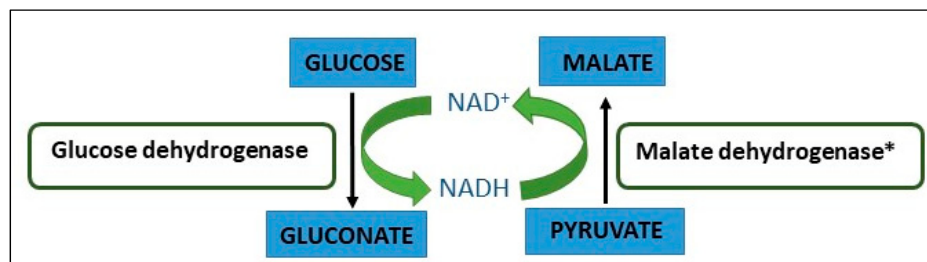

**Figure S2.** Effect of atmospheric conditions and the reaction temperature on the initial rate of MDH\*.

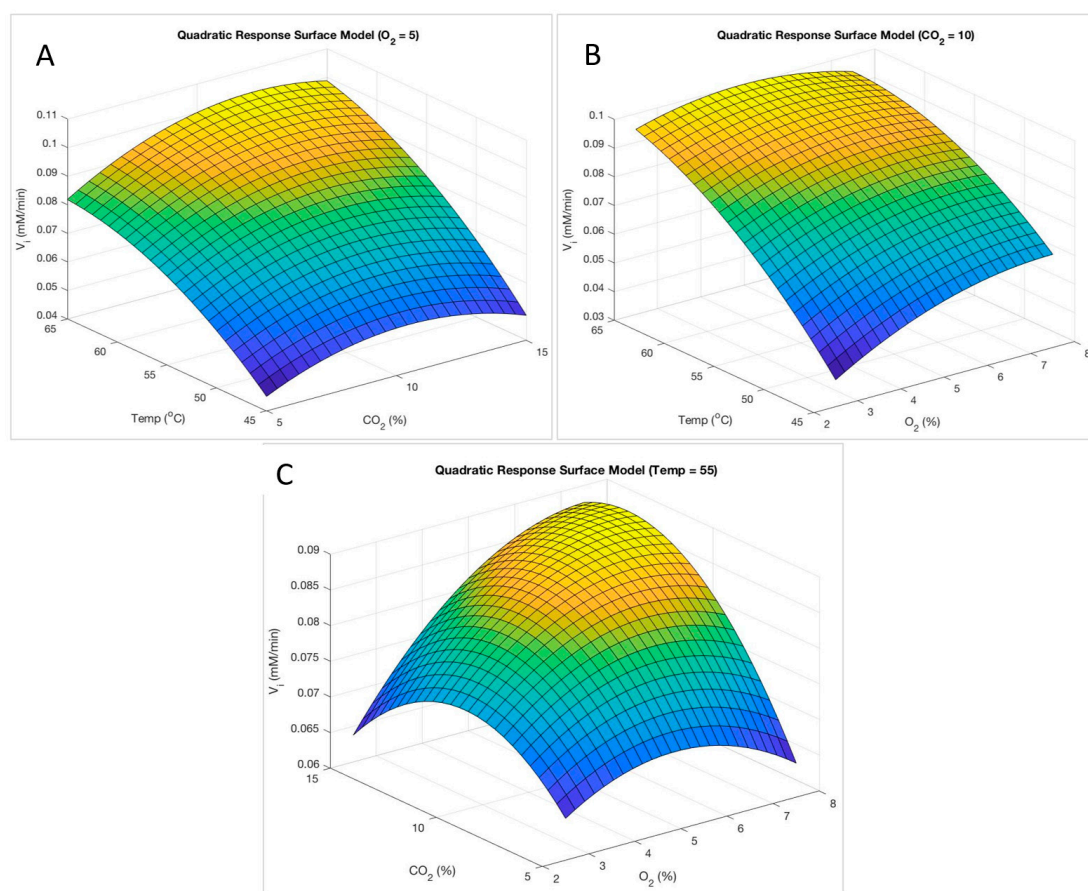

Supplement: s1 [file s1]
